# Supplementary material for: An integrated map of fibroblastic populations in human colon mucosa and cancer tissues
Source: PubMed Central journal article supplement (PMC9719516; doi:10.1038/s42003-022-04298-5), 2022-12-03
Supplement: 42003_2022_4298_MOESM3_ESM.pdf [file 42003_2022_4298_MOESM3_ESM.pdf]

## Description of Additional Supplementary Files

**File name:** Supplementary Data 1

**Description:** Cell counts and cell frequencies table for the fibroblastic populations in the normal human mucosa.

**File name:** Supplementary Data 2

**Description:** Table of marker genes for the human mucosa fibroblastic populations.

**File name:** Supplementary Data 3

**Description:** Table of marker genes for the fibroblastic populations in the integrated analysis of human mucosa and cancer tissue.

**File name:** Supplementary Data 4

**Description:** Cell counts and cell frequencies table for the fibroblastic populations in the integrated analysis of human mucosa and cancer tissue.

**File name:** Supplementary Data 5

**Description:** Differentially Expressed genes cancer tissue vs normal mucosa of each fibroblastic population.

**File name:** Supplementary Data 6

**Description:** Table of marker genes for the subpopulations of RGS5+ fibroblasts.

**File name:** Supplementary Data 7

**Description:** Cell counts and cell frequencies table for the subpopulations of RGS5+ fibroblasts.

**File name:** Supplementary Data 8

**Description:** Table of marker genes for the subpopulations of CXCL14+ fibroblasts.

**File name:** Supplementary Data 9

**Description:** Cell counts and cell frequencies table for the subpopulations of CXCL14+ fibroblasts.
